# Supplementary material for: Achieving the robust immobilization of CoP nanoparticles in cellulose nanofiber network-derived carbon via chemical bonding for a stable potassium ion storage
Source: Royal Society of Chemistry journal article supplement (doi:10.1039/d0ra09478a), 2020-01-01
Supplement: d0ra09478a1.pdf [file d0ra09478a1.pdf]

## Supporting Information

### **Achieving robust immobilization of CoP nanoparticles in cellulose nanofiber networks-derived carbon via chemical bonding for stable potassium-ion storage**

*Xudong Zhao<sup>1‡</sup>, Dan Zhou<sup>1‡\*</sup>, Mingyang Chen<sup>2,4,5\*</sup>, Jiaqi Yang<sup>3</sup>, Li-Zhen Fan<sup>1\*</sup>*

<sup>1</sup> Center for Green Innovation, School of Mathematics and Physics & Beijing Advanced Innovation Center for Materials Genome Engineering, University of Science and Technology Beijing, Beijing 100083, China

<sup>2</sup> Center for Green Innovation, School of Materials Science and Engineering, University of Science and Technology Beijing, Beijing 100083, China

<sup>3</sup> Office of Educational Administration, Shenyang Open University, Shenyang 110003, China

<sup>4</sup> Shunde Graduate School of University of Science and Technology Beijing, Foshan 528000, China

<sup>5</sup> Beijing Computational Science Research Center, Beijing 100084, China

<sup>‡</sup>These authors contributed equally to this work.

\*Corresponding authors: [zhoudan@ustb.edu.cn](mailto:zhoudan@ustb.edu.cn) (D. Zhou); [mychen@ustb.edu.cn](mailto:mychen@ustb.edu.cn) (M. Chen);  
[fanlizhen@ustb.edu.cn](mailto:fanlizhen@ustb.edu.cn) (L.-Z. Fan).

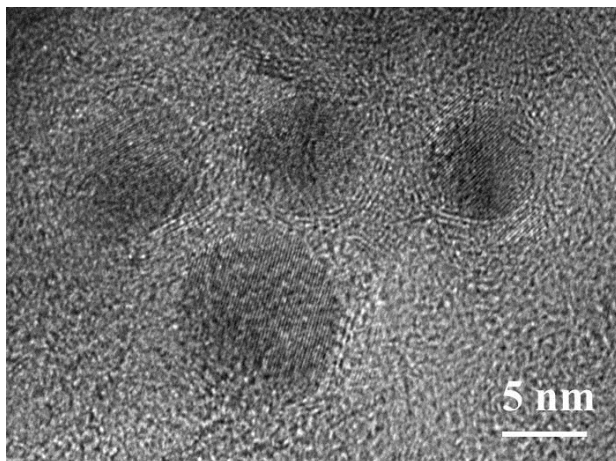

**Fig. S1** TEM image of the CoP@CNFC composite.

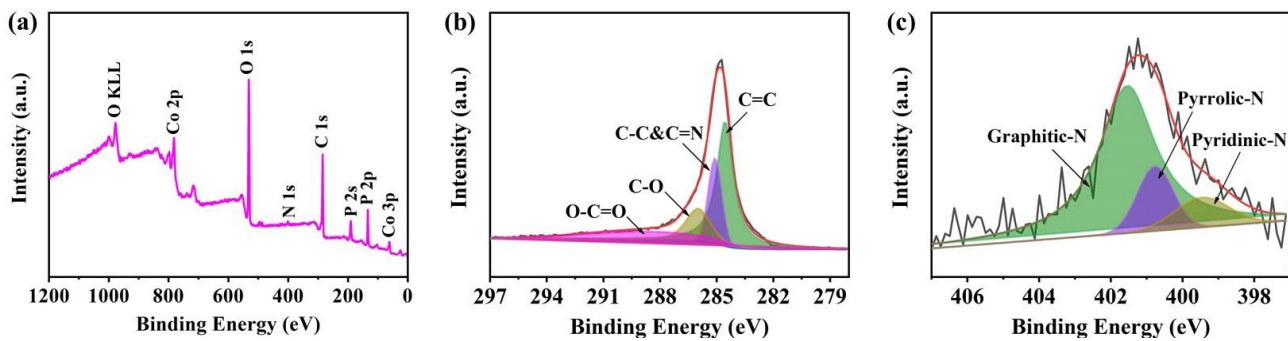

**Fig. S2** (a) X-ray photoelectron spectroscopy (XPS) spectra of CoP@CNFC. (b) High-resolution C 1s. (c) High-resolution N 1s.

**Table S1** Elemental content analysis result of the CoP@CNFC composite

| Elements | Atomic Mass | Atomic Percentage<br>(at%) | Mass content<br>(wt%) |
|----------|-------------|----------------------------|-----------------------|
| C        | 12.01       | 43.14                      | 28.0                  |
| N        | 14.00       | 1.40                       | 1.10                  |
| Co       | 58.93       | 6.23                       | 19.8                  |
| P        | 15.98       | 10.76                      | 18.0                  |
| O        | 16.00       | 38.46                      | 33.1                  |

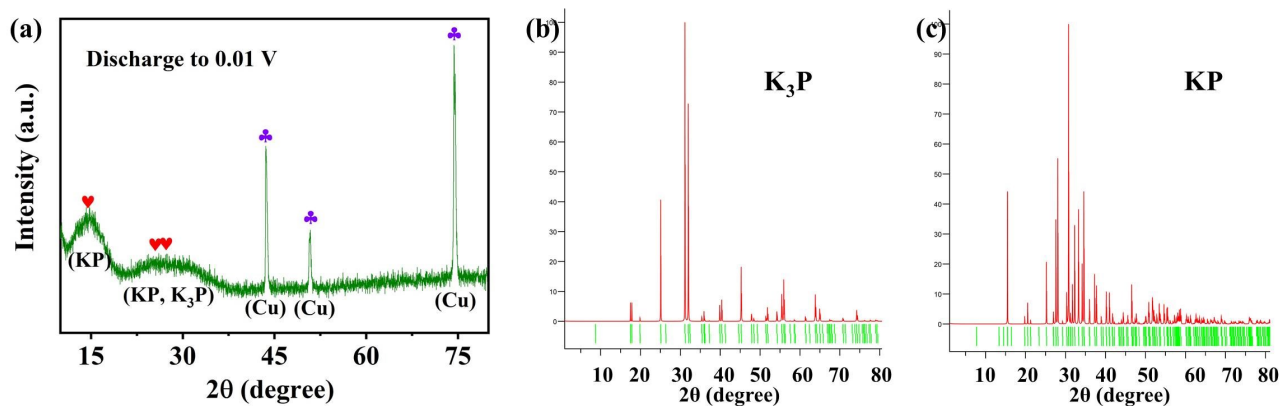

**Fig. S3** (a) *Ex-situ* XRD patterns of the electrode discharged to 0.01 V. (b, c) the corresponding XRD patterns of the generated K<sub>3</sub>P and KP at the fully discharged stage (0.01V).

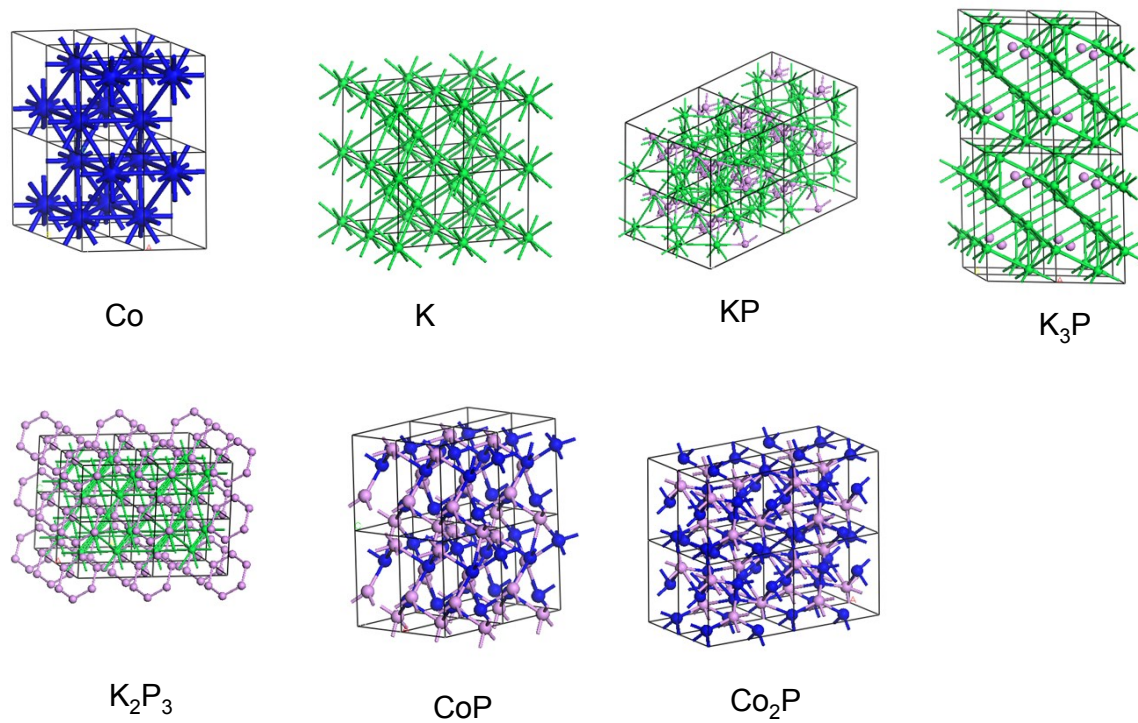

**Fig. S4.** Optimized bulk species related to the CoP-K-ion battery at the PBE level. Color code: green = K, pink = P, and blue = Co.

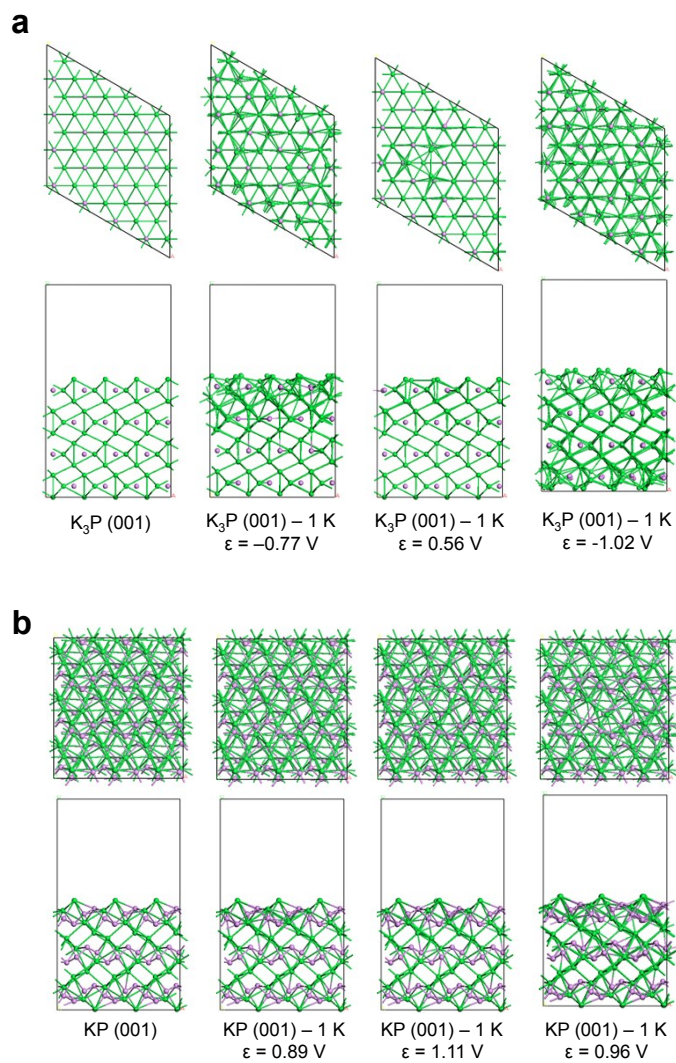

**Fig. S5.** Optimized geometries and predicted reduction potentials vs.  $K^+/K$  for (a)  $K_3P$  (001) and (b) KP (001) surfaces at the PBE level. Color code: green = K, and pink = P.

CoP (011):

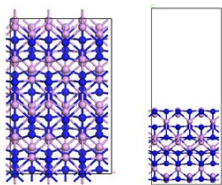

K-coverage  $\leq$  monolayer:

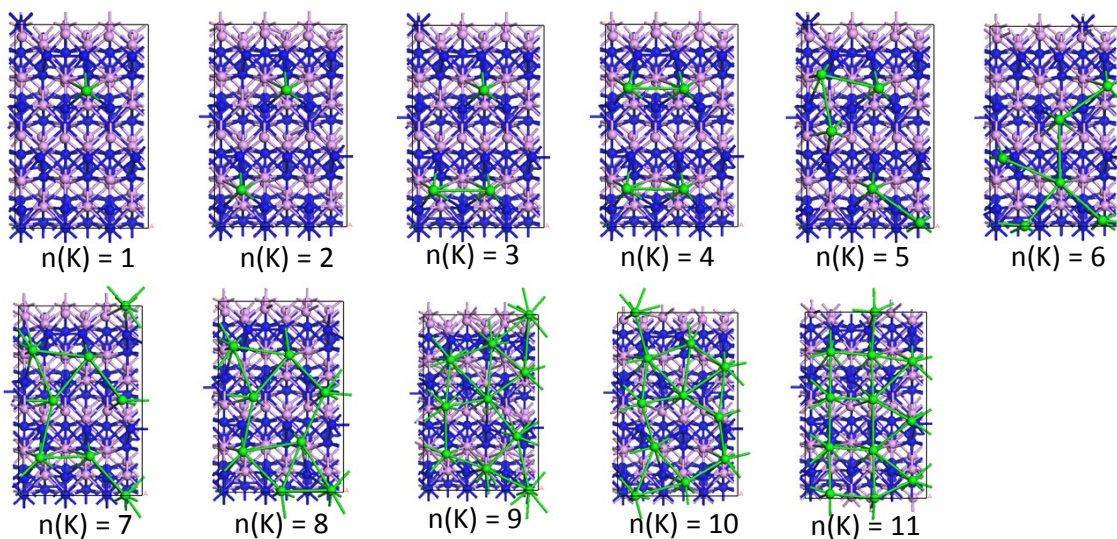

K-coverage  $>$  monolayer:

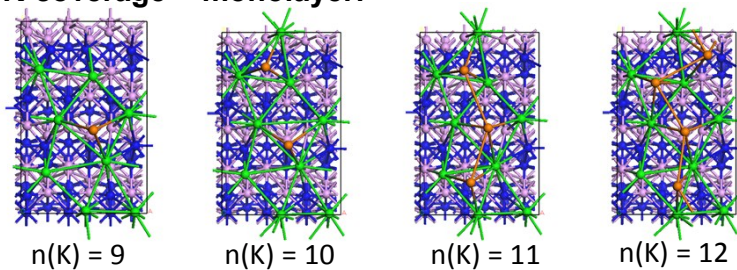

**Fig. S6.** Optimized geometries for potassiation of the CoP(011) slab. The surface area of the slab is  $147.0 \text{ \AA}^2$ . Color code: green = K (first layer), orange = K (second layer), pink = P, and blue = Co.



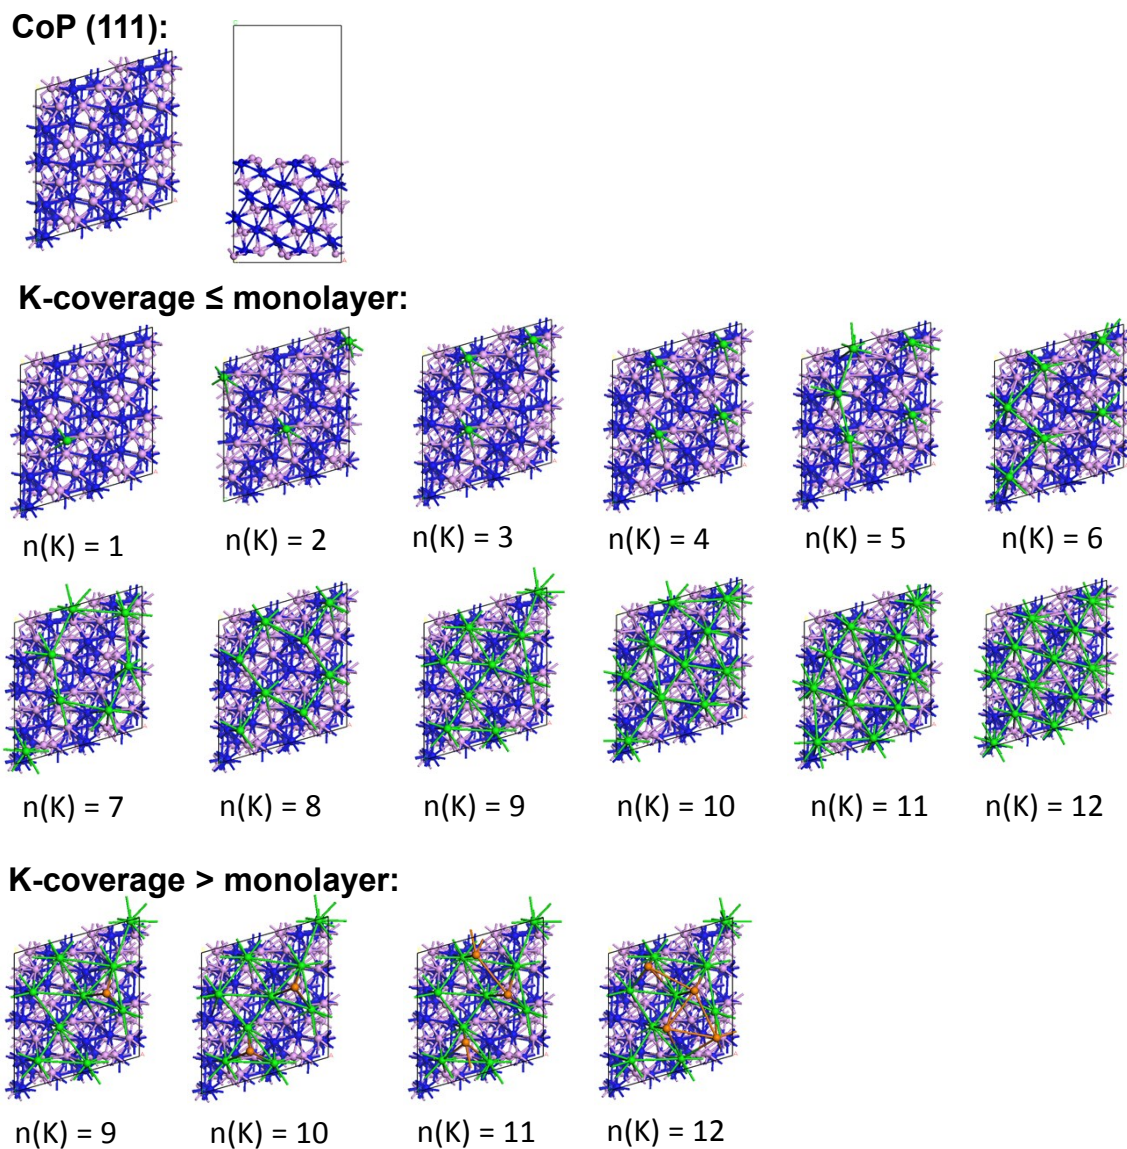

**Fig. S7.** Optimized geometries for potassiation of the CoP(111) slab. The surface area of the slab is  $148.9 \text{ \AA}^2$ . Color code: green = K (first layer), orange = K (second layer), pink = P, and blue = Co.

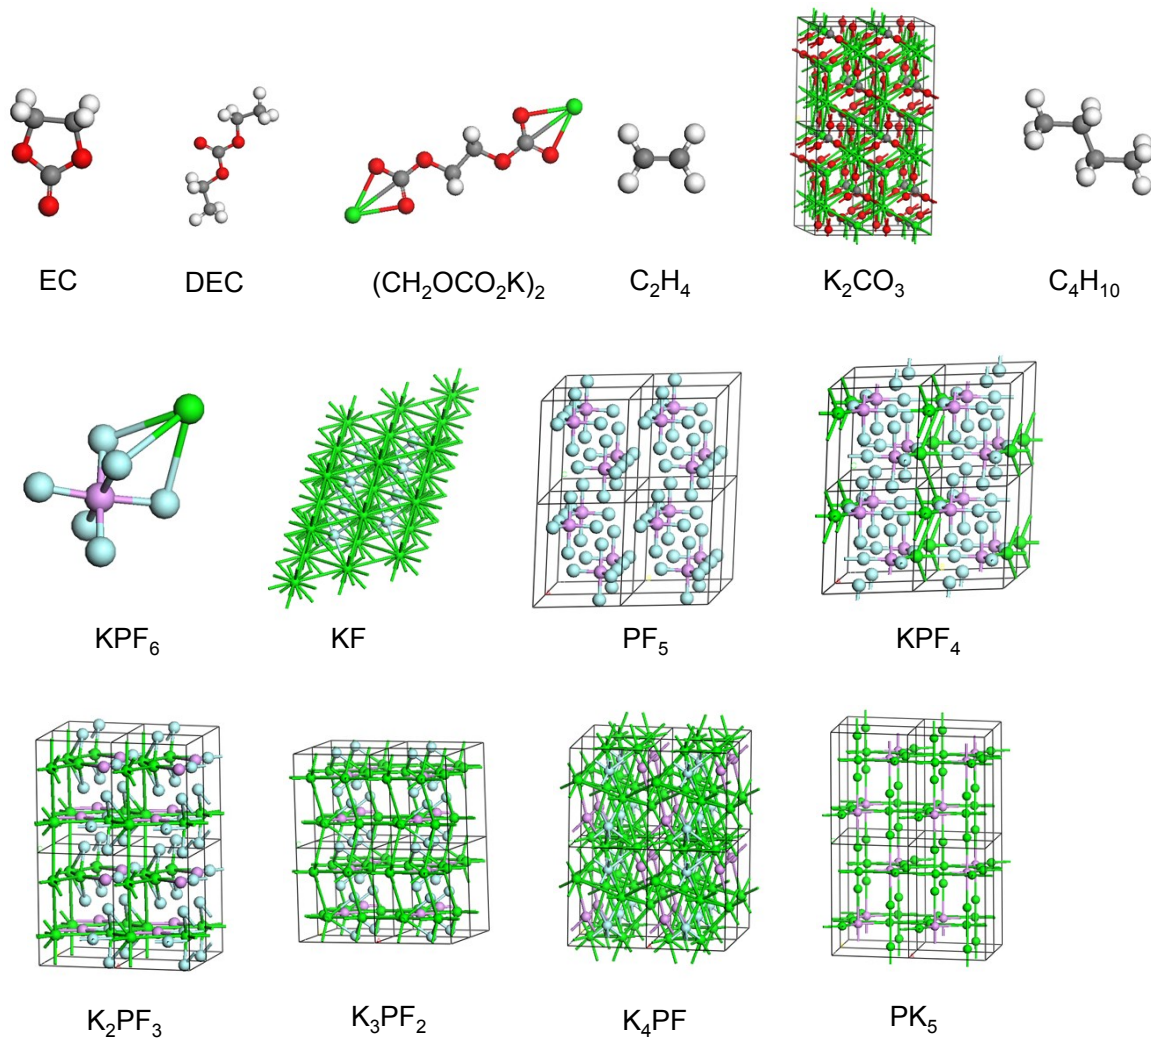

**Fig. S8.** SEI-related Species for K-ion battery with EC, DEC, and  $\text{KPF}_6$  electrolytes.
